# Supplementary material
Source: Springer Nature journal article supplement (https://www.springermedizin.de/resource/supplementary/12939_2013_412_MOESM4_ESM.pdf/9551118)

### Oseltamivir per Capita (OD)

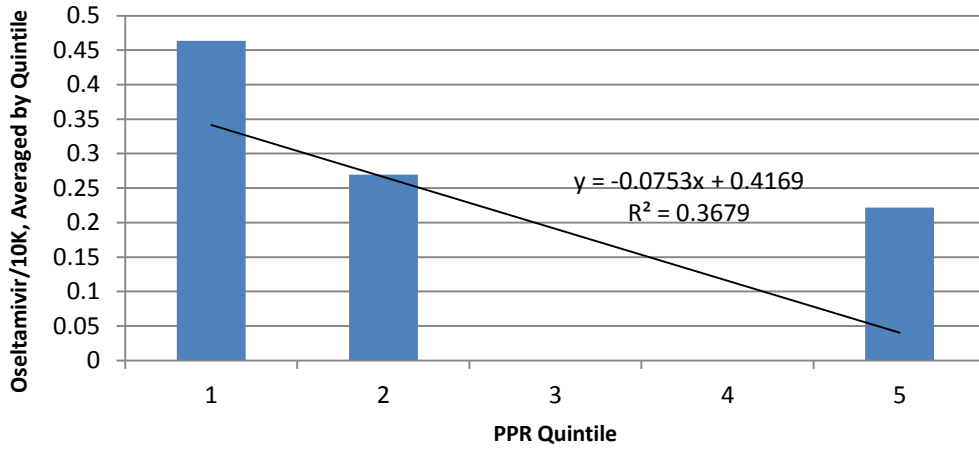

### Adult Ventilators per Capita (OD)

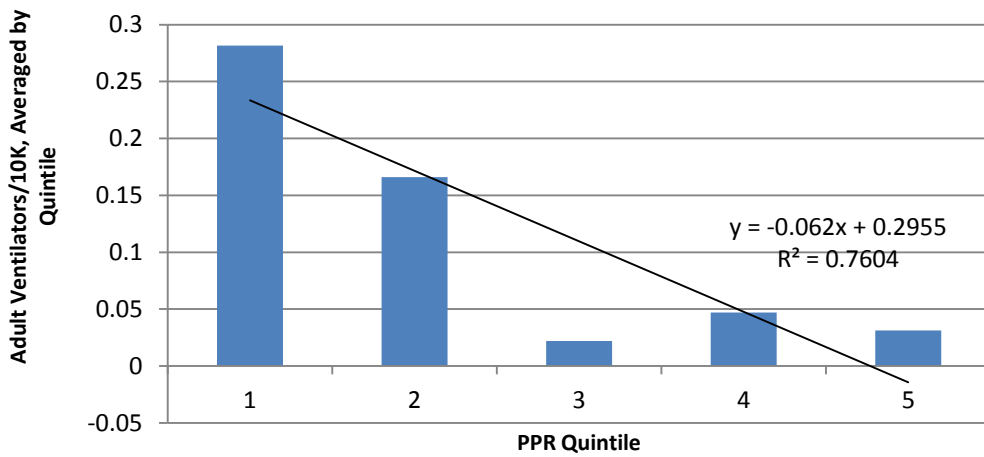

### Pediatric Ventilators per Capita (OD)

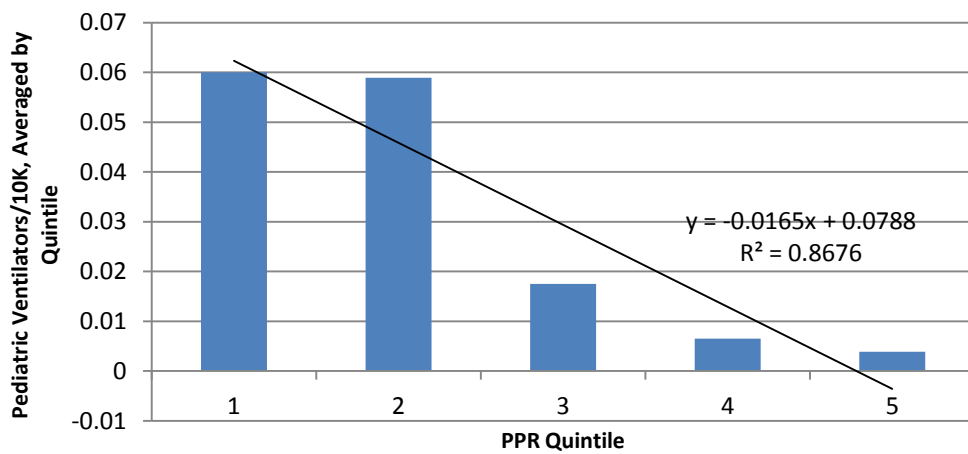

Supplement: MOESM4 [file 9551118]
